# Supplementary material for: Multidimensional Modeling of Traits and Response Styles
Source: Atypon-hosted journal article supplement (doi:10.1027/1015-5759/a000291), 2015-10-30
Supplement: 1015-5759_a000291_esm1.pdf [file 1015-5759_a000291_esm1.pdf]

## Electronic Supplementary Material 1

Electronic Supplementary Material 1 explains the multidimensional partial credit model (MPCM) using the notation introduced by Kelderman (1996). In the MPCM,  $s$  trait parameters  $\theta_{jq}$  ( $q = 1, \dots, s$ ) exist.  $\omega_{qiy}$  is an indicator variable pre-specified by the researcher which reflects the assignment of items to dimensions. It takes the value 1 if the response to an item measures dimension  $q$  and 0 if it does not. The MPCM then models the probability ( $\pi_{ijx}$ ) that a person  $j$  with trait levels  $\theta_{jq}$  on the  $s$  dimensions will respond in category  $x$  ( $x = 1, \dots, r$ ) of item  $i$  as

$$\pi_{ijx} = \frac{\exp \left[ \sum_{y=1}^x \left( \sum_{q=1}^s \omega_{qiy} \theta_{jq} - \delta_{iy} \right) \right]}{1 + \sum_{z=1}^{r_i} \exp \left[ \sum_{y=1}^z \left( \sum_{q=1}^s \omega_{qiy} \theta_{jq} - \delta_{iy} \right) \right]}. \quad (1)$$

In Equation 1,  $\delta_{iy}$  denotes the threshold parameter between two response categories  $x=y-1$  and  $x=y$ . When  $s = 1$  and for all items  $\omega_{qiy} = 1$  in Equation 1, the unidimensional PCM results.

### Reference

Kelderman, H. (1996). Multidimensional Rasch models for partial-credit scoring. *Applied Psychological Measurement*, 20(2), 155-168. doi:10.1177/014662169602000205
